# Supplementary material
Source: PubMed Central journal article supplement (PMC2830006)
Supplement: NIHMS167891-supplement-01.pdf [file NIHMS167891-supplement-01.pdf]

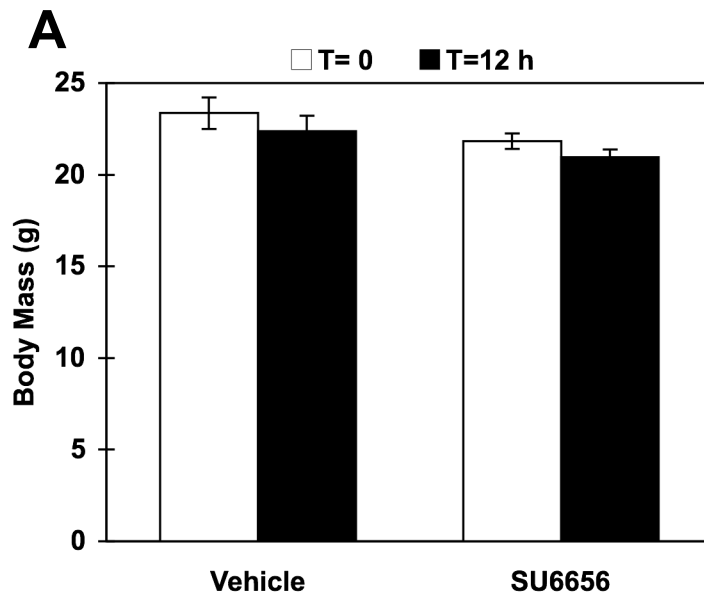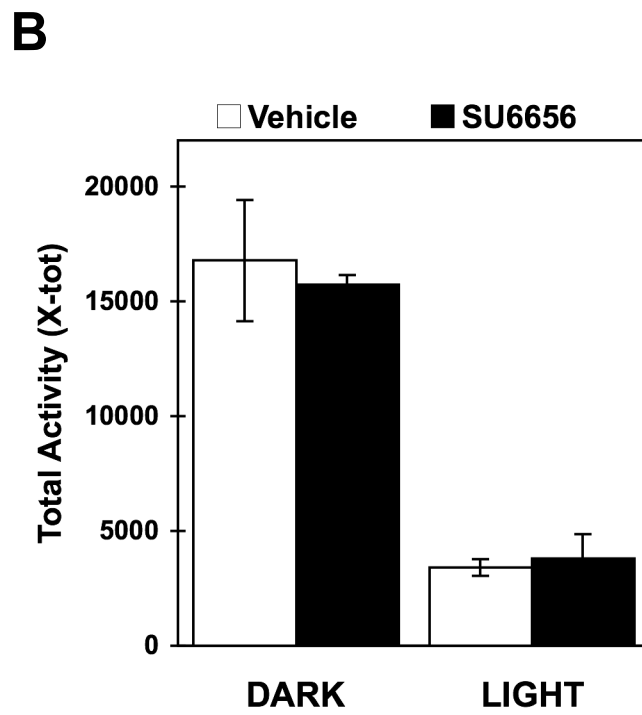

Figure S1

**A) Vehicle**

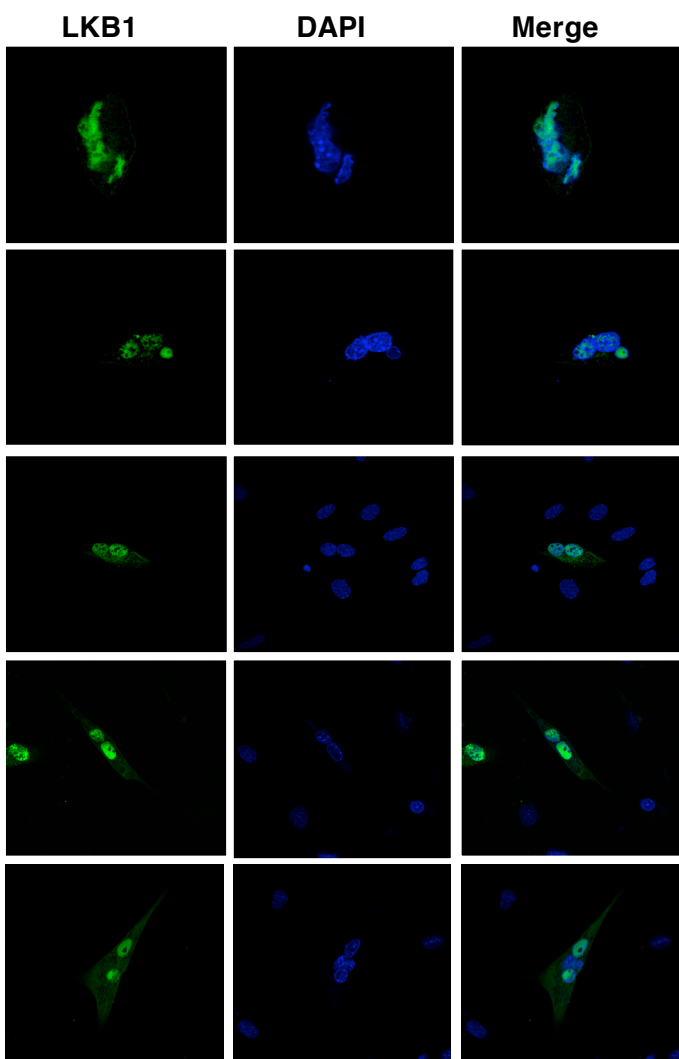

**B) SU6656**

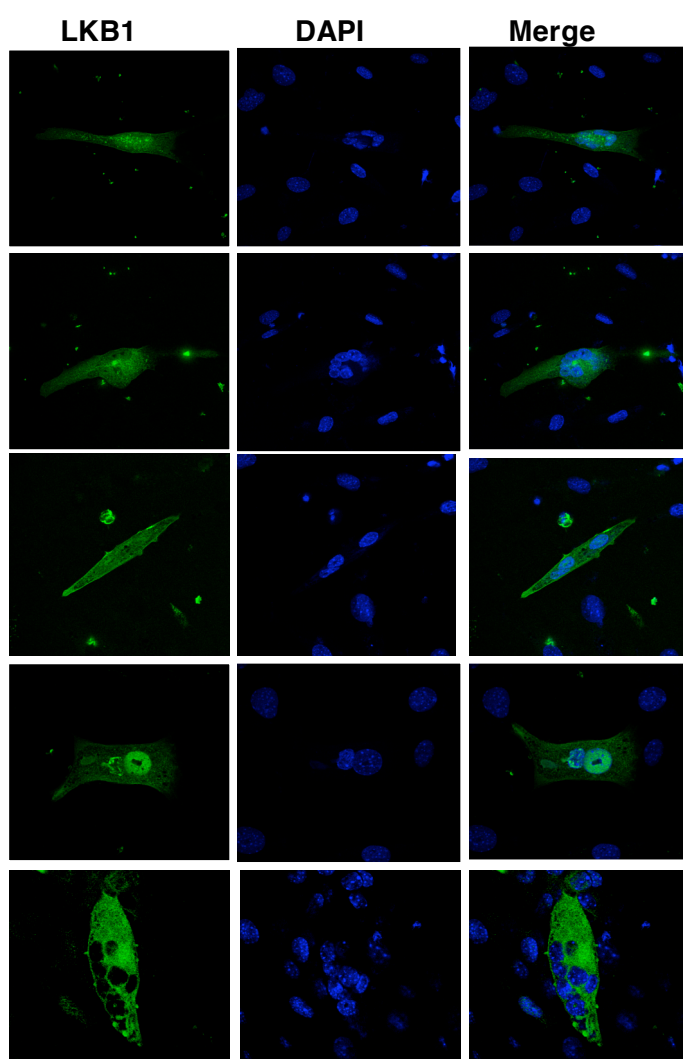

**Figure S2**

A) Fyn-CA

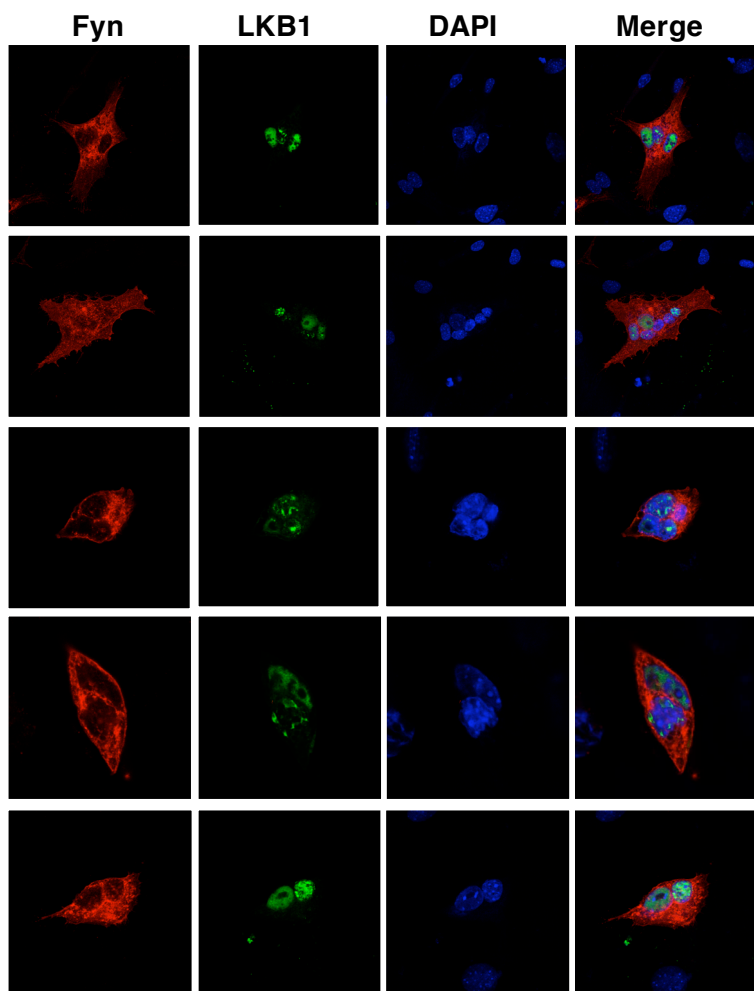

B) Fyn-KD

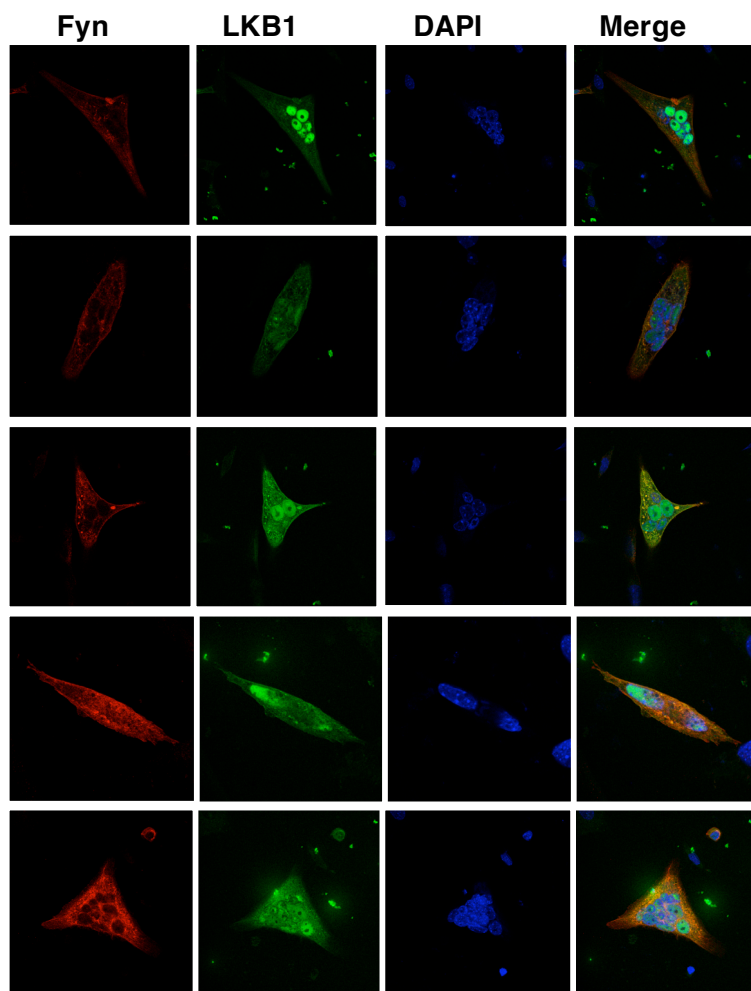

Figure S3

A) Fyn-CA

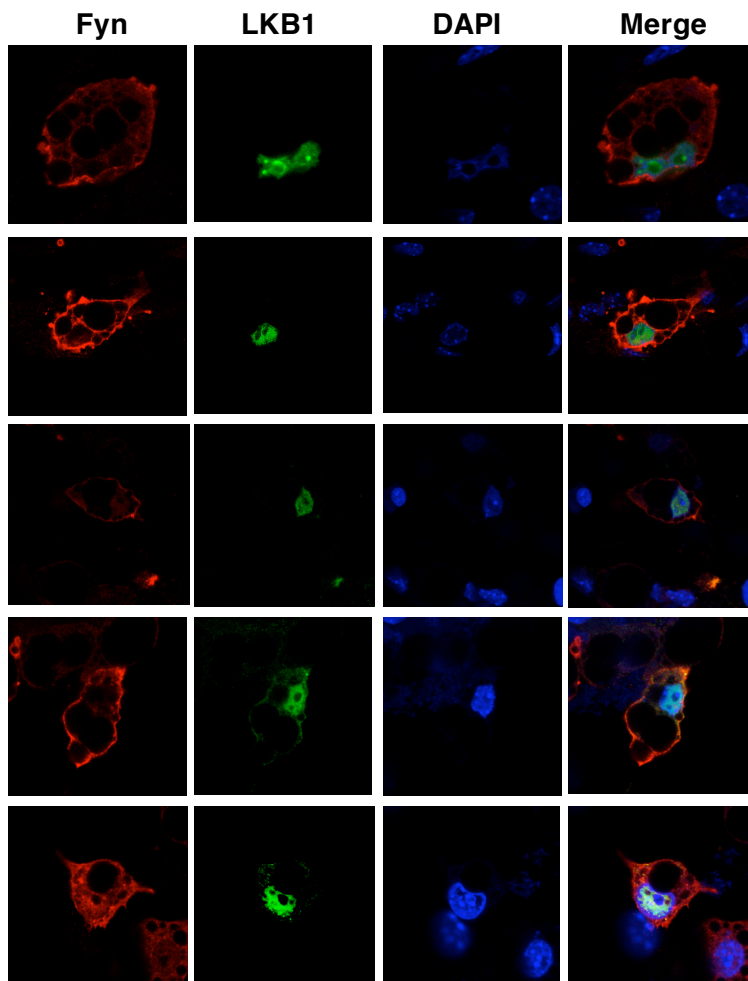

B) Fyn-KD

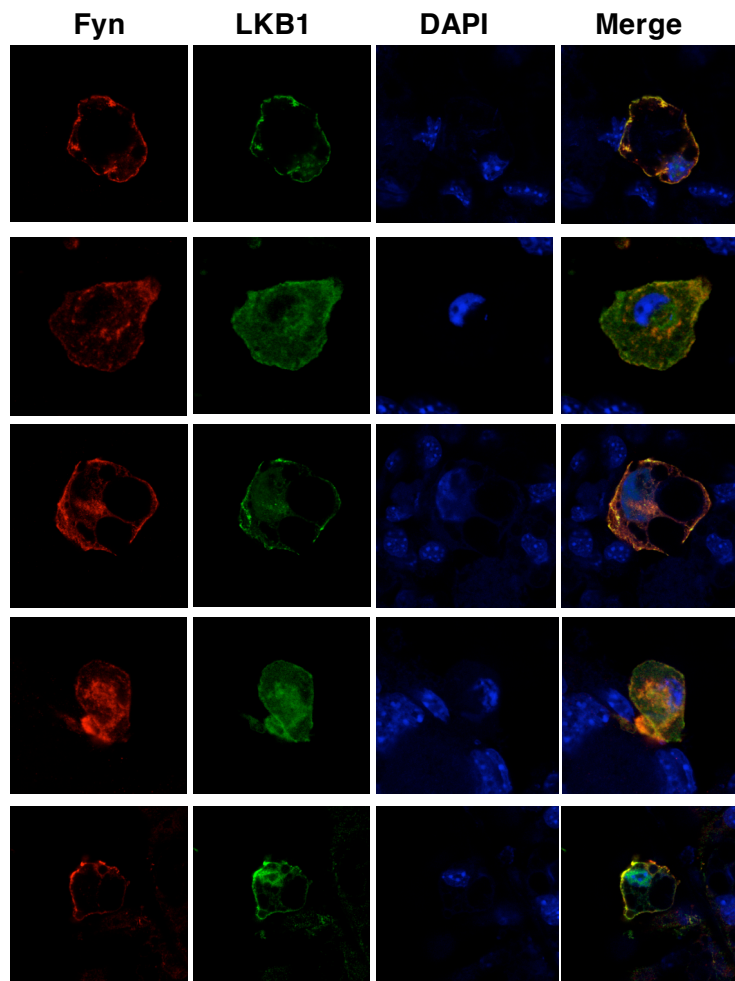

Figure S4

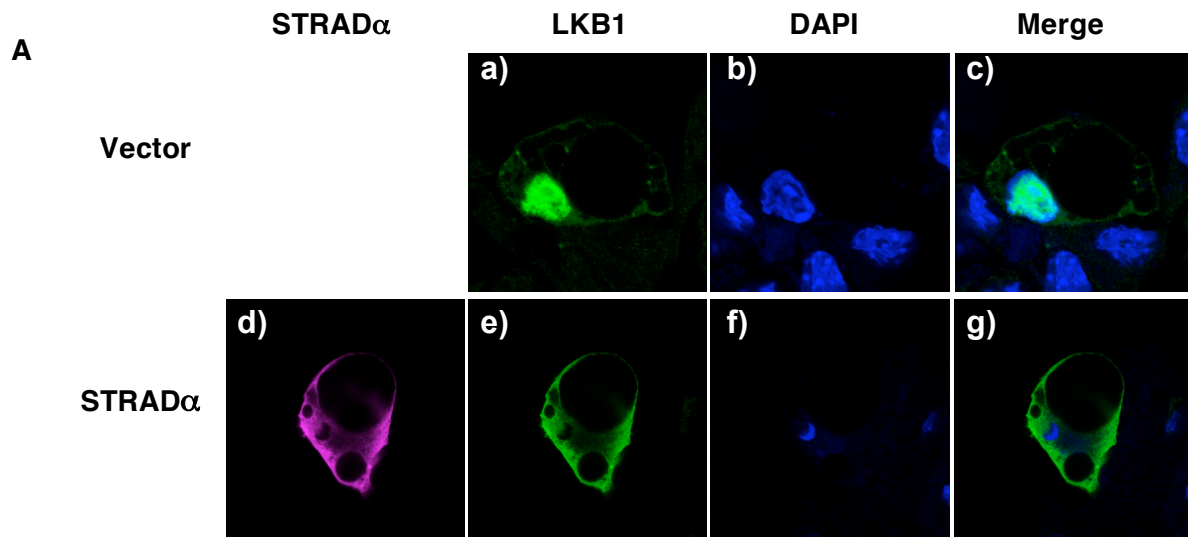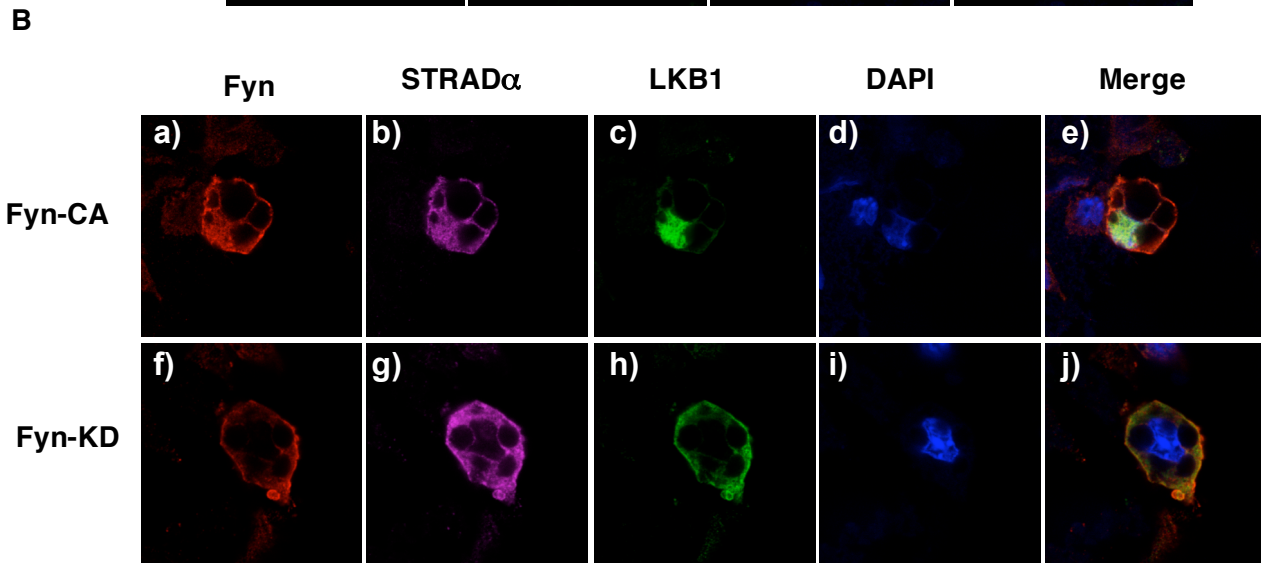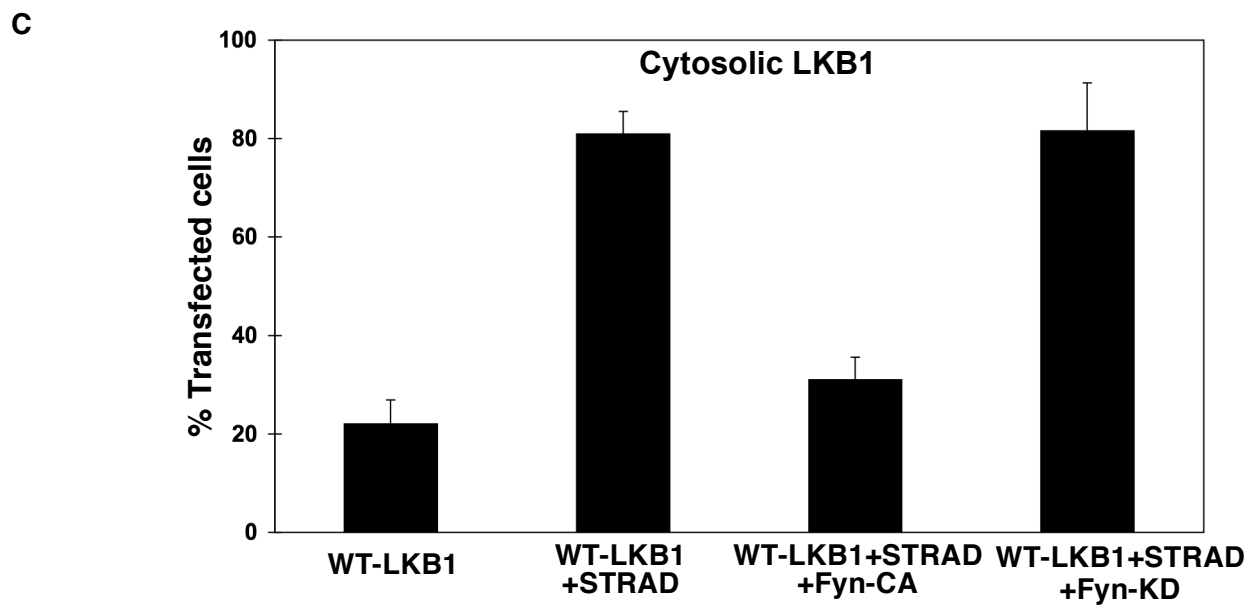

Figure S5

A

|    |                |    |                |    |               |     |                |     |               |
|----|----------------|----|----------------|----|---------------|-----|----------------|-----|---------------|
| 1  | MEVVDPPQLGMFT  | 31 | GEANVKKEIQLLR  | 61 | NLLLTGGTLKIS  | 91  | SYAIPGDCGPPLS  | 121 | IYTQDFTVPGQVP |
| 2  | VDPPQLGMFTEGE  | 32 | NVKKEIQLLRRLR  | 62 | LTTGGTLKISDLG | 92  | IPGDCGPPLSDLL  | 122 | QDFTVPGQVPEEE |
| 3  | QQLGMFTEGELMS  | 33 | KEIQLLRRLRHKN  | 63 | GGTLKISDLGVAE | 93  | DCGPPLSDLLKGM  | 123 | TVPGQVPEEEASH |
| 4  | GMFTEGELMSVGM  | 34 | QLLRRLRHKNVIQ  | 64 | LKISDLGVAEALH | 94  | PPLSDLLKGMLEY  | 124 | GQVPEEEASHNGQ |
| 5  | TEGELMSVGMDF   | 35 | RRLRHKNVIQLVD  | 65 | SDLGVAEALHPFA | 95  | SDLLKGMLEYEPA  | 125 | PEEEASHNGQRRG |
| 6  | ELMSVGMDFIHR   | 36 | RHKNVQLVDVLY   | 66 | GVAEALHPFAADD | 96  | LKGMLEYEPAKRF  | 126 | EASHNGQRRGLPK |
| 7  | SVGMDFIHRIDS   | 37 | NVIQLVDVLYNEE  | 67 | EALHPFAADDTCR | 97  | MLEYEPAKRF SIR | 127 | HNGQRRGLPKAVC |
| 8  | MDTFIHRIDSTE   | 38 | QLVDVLYNEEKQK  | 68 | HPFAADDTCRTSQ | 98  | YEPAKRF SIRQIR | 128 | QRRGLPKAVCMNG |
| 9  | FIHRIDSTEVIYQ  | 39 | DVLYNEEKQKMYM  | 69 | AADDTCRTSQGSP | 99  | AKRFSIRQIRQHS  | 129 | GLPKAVCMNGTEA |
| 10 | RIDSTEVIYQPRR  | 40 | YNEEKQKMYMVM   | 70 | DTCRTSQGSPAFQ | 100 | FSIRQIRQHSWFR  | 130 | KAVCMNGTEAAQL |
| 11 | STEVIYQPRRKRA  | 41 | EKQKMYMVMYCV   | 71 | RTSQGSPAFQPEE | 101 | ROIHQHSWFRKKH  | 131 | CMNGTEAAQLSTK |
| 12 | VYQPRRKRAKLI   | 42 | KMYMVMYCVCGM   | 72 | QGSPAFQPEEIAN | 102 | RQHSWFRKKHPPA  | 132 | GTEAAQLSTKSRA |
| 13 | QPRRKRAKLIGKY  | 43 | MVMEYCVCGMQEM  | 73 | PAFQPEEIANGLD | 103 | SWFRKKHPPAEA P | 133 | AAQLSTKSRAEGR |
| 14 | RKRAKLIGKYLGM  | 44 | EYCVCGMQEMLDS  | 74 | QPPEIANGLDTFS | 104 | RKKHPPAEAPVPI  | 134 | LSTKSRAEGRAPN |
| 15 | AKLIGKYLGMDDL  | 45 | VCGMQEMLDSVPE  | 75 | EIANGLDTFSGFK | 105 | HPPAEAPVPIPPS  | 135 | KSRAEGRAPNPAR |
| 16 | IGKYLGMDDLGE   | 46 | MQEMLDSVPEKRF  | 76 | NGLDTFSGFKVDI | 106 | AEAPVPIPPSPDT  | 136 | AEGRAPNPARKAC |
| 17 | YLMGDLLEGSYG   | 47 | MLDSVPEKRFPPVC | 77 | DTFSGFKVDIWSA | 107 | PVPIPPSPDTKDR  | 137 | RAPNPARKACSAS |
| 18 | GDLLGEGSYGKVK  | 48 | SVPEKRFPPVCAH  | 78 | SGFKVDIWSAGVT | 108 | IPSPDTKDRWRS   | 138 | NPARKACSASSKI |
| 19 | LGEGSYGKVKVLD  | 49 | EKRFPVCAHGYF   | 79 | KVDIWSAGVTLYN | 109 | SPDTKDRWRSMTV  | 139 | RKACSASSKIRRL |
| 20 | GSYGKVKVLDSE   | 50 | FPVCAHGYFCQL   | 80 | IWSAGVTLYNITT | 110 | TKDRWRSMTVVPY  | 140 | CSASSKIRRLSAC |
| 21 | GKVKVLDSETL    | 51 | CQAHGYFCQLIDG  | 81 | AGVTLYNITTGLY | 111 | RWRSMTVVPYLED  | 141 | SSKIRRLSACKQQ |
| 22 | KEVLDSETLCRRA  | 52 | HGYFCQLIDGLE   | 82 | TLYNITTGLYPFE | 112 | SMTVVPYLEDLHG  |     |               |
| 23 | LDSETLCRRAVKI  | 53 | FCQLIDGLEYLHS  | 83 | NITTGLYPFEGDN | 113 | VVPYLEDLHGADE  |     |               |
| 24 | ETLCRRAVKILKK  | 54 | LIDGLEYLHSQGI  | 84 | TGLYPFEGDNIIK | 114 | YLEDLHGADEDED  |     |               |
| 25 | CRRAVKILKKKLL  | 55 | GLEYLHSQGIIVHK | 85 | YPFEGDNIIKLF  | 115 | DLHGADEDEDLFD  |     |               |
| 26 | AVKILKKKLLRRI  | 56 | YLHSQGIIVHKDIK | 86 | EGDNIIKLFENIG | 116 | GADEDEDLFDIED  |     |               |
| 27 | ILKKKLLRRIPNG  | 57 | SQGIIVHKDIKPGN | 87 | NIYKLFENIGKGS | 117 | EDEDLFDIEDDII  |     |               |
| 28 | KKKLLRRIPNGEAN | 58 | IVHKDIKPGNLLL  | 88 | KLFENIGKGSYAI | 118 | DLFDIEDDIIYTQ  |     |               |
| 29 | LLRRIPNGEANVKK | 59 | KDIKPGNLLTTG   | 89 | ENIGKGSYAI    | 119 | DIEDDIIYTQDFT  |     |               |
| 30 | IPNGEANVKKIQ   | 60 | KPGNLLTTGGTL   | 90 | GKGSYAI       | 120 | DDIIYTQDFTVPG  |     |               |

B

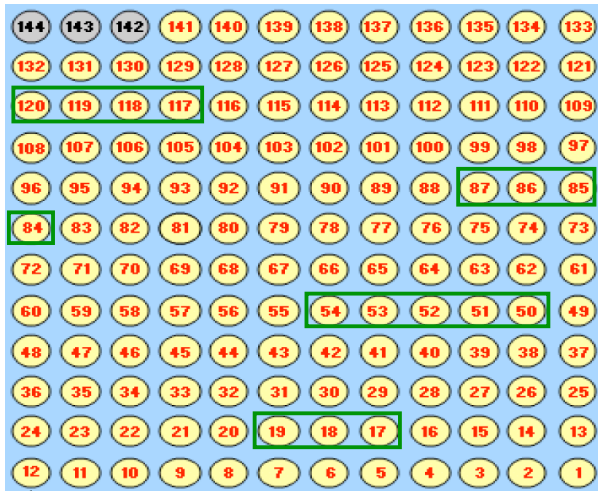

C

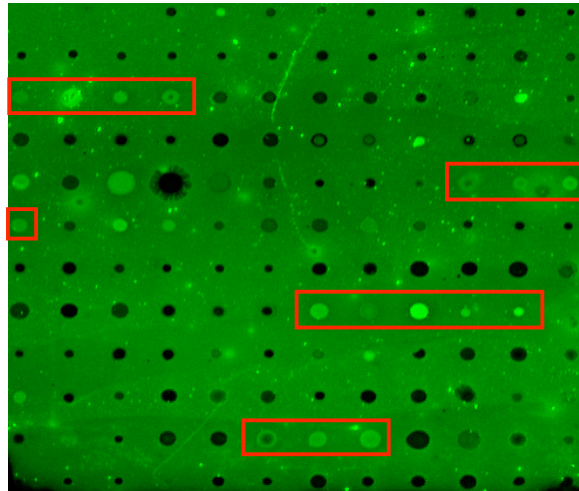

Figure S6

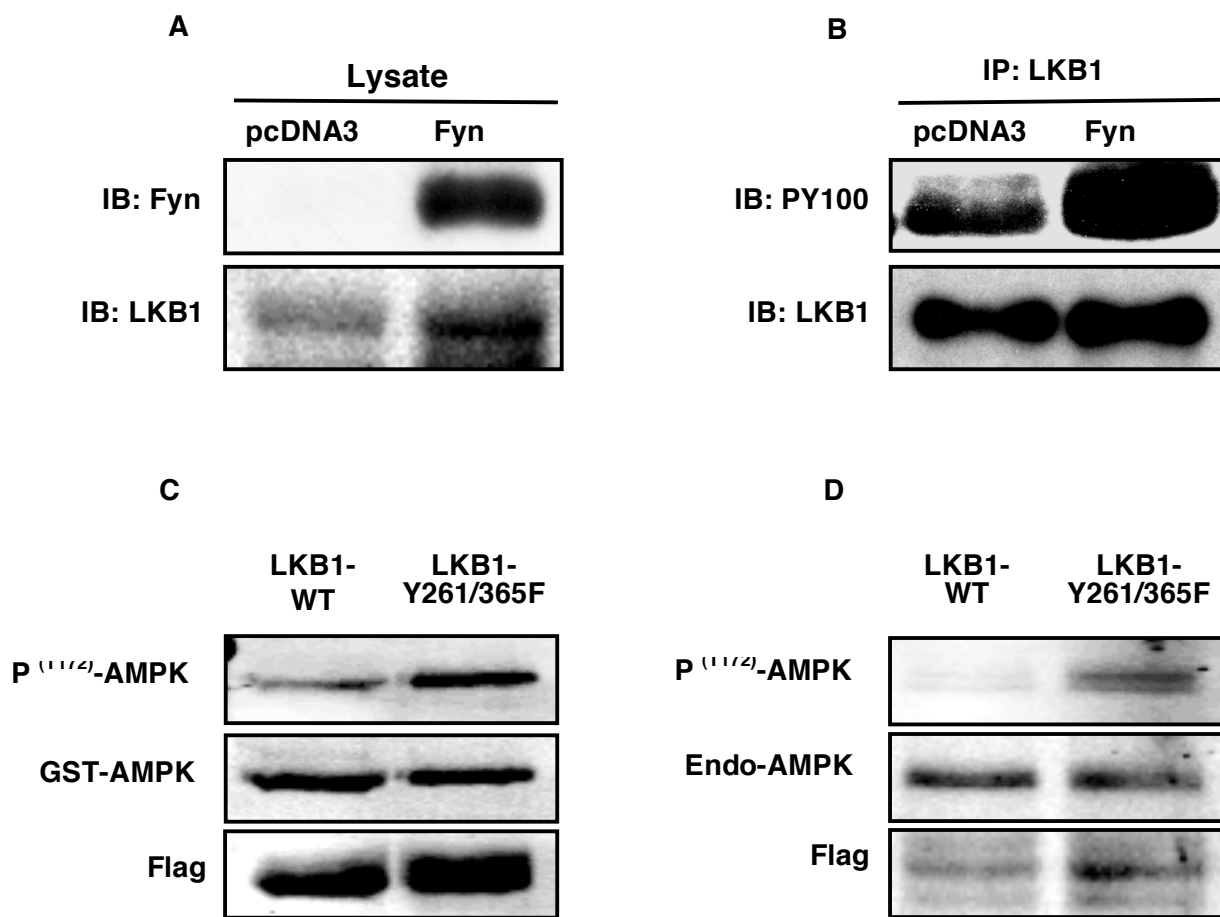

Figure S7

## Inventory

There are no supplemental experimental procedures or additional references.

**Figure 1S:** Effects of the SU6656 on body mass and physical activity in the Fyn null mice. Related to Figure 2 that shows the effects of SU6656 in wild type mice.

**Figure 2S:** Requested by the editor. Composite image for significant representation of C2C12 cells treated with vehicle or SU6656. Related to Figure 4A.

**Figure 3S:** Requested by the editor. Composite image for significant representation of C2C12 cells transfected with Fyn-CA or Fyn-KD. Related to Figure 4C.

**Figure 4S:** Requested by the editor. Composite image for significant representation of 3T3L1 cells transfected with Fyn-CA or Fyn-KD. Related to Figure 4E.

**Figure 5S:** Requested by the editor and the reviewers. Representation of 3T3L1 cells transfected with STRAD $\alpha$ , Fyn-KD or Fyn-CA and signal quantification. Related to Figure 4.

**Figure 6S:** Represents the JPT peptide technology. Related to Figure 5.

**Figure 7S:** Represents the effects of LKB1-Y261/365F double mutant in vivo. Related to Figure 7.

## Supplemental Figure Legends

**Figure S1: SU6656 does not induced weight loss or alter locomoter activity in the Fyn null mice.** **A)** Body Mass before (T= 0, open bar) and after (T= 12 h (dark bar) vehicle or SU6656 injection to the Fyn null mice. **B)** Locomotor activity.

**Figure S2: The selective Src family kinase inhibitor SU6656 alters LKB1 subcellular distribution in C2C12 myotubes.** Five representative images of C2C12 myotubes transfected with pEGFP-LKB1 and incubated with vehicle (**A**) or SU6656 (**B**). Cells were imaged as described in Figure 4.

**Figure S3: Expression of kinase-defective Fyn in C2C12 myotubes results in nuclear export of LKB1.** Five representative images of C2C12 myotubes co-transfected with pEGFP-LKB1 and pcDNA3-Fyn-CA (**A**) or pcDNA3-Fyn-KD (**B**). Cells were imaged as described in Figure 4.

**Figure S4: Expression of kinase-defective Fyn in 3T3L1 adipocytes results in nuclear export of LKB1.** Five representative images of differentiated 3T3L1 adipocytes co-transfected with pcDNA3-LKB1 and pcDNA3-Fyn-CA (**A**) or pcDNA3-Fyn-KD (**B**). Cells were imaged as described in Figure 4.

**Figure S5: STRAD $\alpha$  does not affect Fyn-induced LKB1 translocation into the nucleus.** **A)** Fully differentiated 3T3L1 adipocytes were transfected with pcDNA3-Flag-LKB1 (panels a-c) or with pcDNA3-Flag-LKB1 and Omni-STRAD $\alpha$  (panels d-g). Immunofluorescence was performed using a mouse Flag



monoclonal antibody and rabbit Omni monoclonal antibody followed by Alexa Fluor 488 anti-mouse IgG (green) and Alexa Fluor 647 anti-rabbit IgG (purple). Nuclei were visualized with DAPI (blue). **B)** Fully differentiated 3T3L adipocytes were co-transfected with pcDNA3-Flag-LKB1, Omni-STRAD $\alpha$  and pcDNA3-V5-Fyn-CA (panels a-e) or pcDNA3-V5-Fyn-KD (panels f-j). Immunofluorescence was performed using a mouse Flag monoclonal antibody, a chicken V5 polyclonal antibody and rabbit Omni monoclonal antibody followed by Alexa Fluor 488 anti-mouse IgG (green), Alexa Fluor 594 anti-chicken (red) and Alexa Fluor 647 Anti-rabbit IgG (purple) secondary antibodies. Nuclei were visualized with DAPI (blue). **C)** Quantification of the LKB1 signal in the cytoplasm of 3T3L1 cell. Data are representative of n = 3 experiments.

**Figure S6: A)** Sequence of the 141 LKB1 overlapping peptides used as targets for the identification of tyrosine acceptors for Fyn kinase phosphorylation. **B)** Scheme of the glass slide where the 141 overlapping peptides corresponding to LKB1 sequence was immobilized. **C)** Potential tyrosine site phosphorylated by Fyn.

**Figure S7: Expression of the LKB1-Y261/365F double mutant increases T<sup>172</sup>-AMPK phosphorylation.** **A)** Tibialis anterior muscle was transfected with V5-Fyn-CA and muscle extracts were immunoblotted for Fyn and LKB1. **B)** Muscle extracts were immunoprecipitated with the LKB1 antibody and immunoblotted with the PY100 phosphotyrosine and LKB1 antibody. **C)** HeLa cells were transfected with the GST-AMPK  $\alpha$  subunit cDNA and Flag-LKB1-WT or Flag-LKB1-Y261/365F double mutant cDNAs. Levels of LKB1 and AMPK  $\alpha$  subunit expression were assessed by immunoblotting with a Flag or AMPK  $\alpha$  subunit antibody, respectively. AMPK  $\alpha$  subunit phosphorylation were determined using the phospho T172 specific antibody. **D)** Tibialis anterior muscle was transfected with the Flag-LKB1-WT or Flag-LKB1-Y261/365F double mutant cDNAs. Levels of LKB1 expression and endogenous AMPK  $\alpha$  subunit levels were assessed by immunoblotting with a Flag or AMPK  $\alpha$  subunit antibody, respectively. Endogenous AMPK  $\alpha$  subunit phosphorylation were determined using the phospho T172 specific antibody.
